# Supplementary material
Source: Oxford University Press journal article supplement (https://aap2.silverchair-cdn.com/aap2/content_public/journal/pediatrics/issue/149/supplement+7/2/toc.pdf)

## CONTENTS

### ARTICLES

- S720 **Introducing the Blueprint for Change: A National Framework for a System of Services for Children and Youth With Special Health Care Needs**  
Treeby W. Brown et al
- S722 ***A Blueprint for Change: Guiding Principles for a System of Services for Children and Youth With Special Health Care Needs and Their Families***  
Sarah E. McLellan et al
- S731 **Children and Youth With Special Health Care Needs: A Profile**  
Reem M. Ghandour et al
- S748 **Progress, Persistence, and Hope: Building a System of Services for CYSHCN and Their Families** Michael D. Warren et al
- S756 **Health Equity for Children and Youth With Special Health Care Needs: A Vision for the Future** Amy Houtrow et al
- S767 **Quality of Life and Well-Being for Children and Youth With Special Health Care Needs and their Families: A Vision for the Future** Cara L. Coleman et al
- S775 **Access to Services for Children and Youth With Special Health Care Needs and Their Families: Concepts and Considerations for an Integrated Systems Redesign** Dennis Z. Kuo et al
- S782 **Financing Care for CYSHCN in the Next Decade: Reducing Burden, Advancing Equity, and Transforming Systems** Jeff Schiff et al

doi: 10.1542/peds.2021-056150

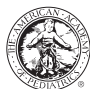

Supplement: Supplementary file 1 [file toc.pdf]
